# Supplementary material
Source: PubMed Central journal article supplement (PMC4876727)
Supplement: NIHMS733686-supplement-Supplemental_Material.pdf [file NIHMS733686-supplement-Supplemental_Material.pdf]

# Supplemental Materials

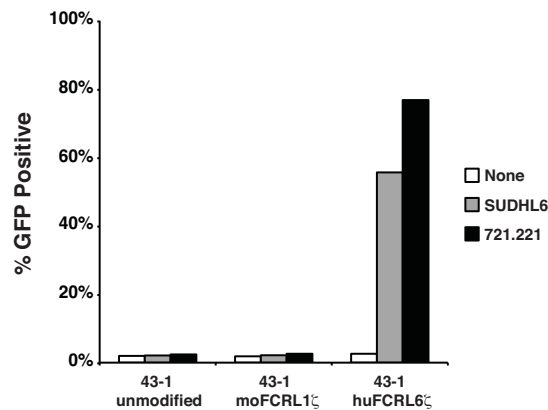

**Supplemental Figure 1.** 43-1 GFP induction by human B cell lines is FCRL6-specific. The indicated 43-1 transductants were cultured for 18 h alone (white columns) or with the SUDHL6 (grey columns) and 721.221 (black columns) B cell lines. GFP expression was measured by flow cytometry.

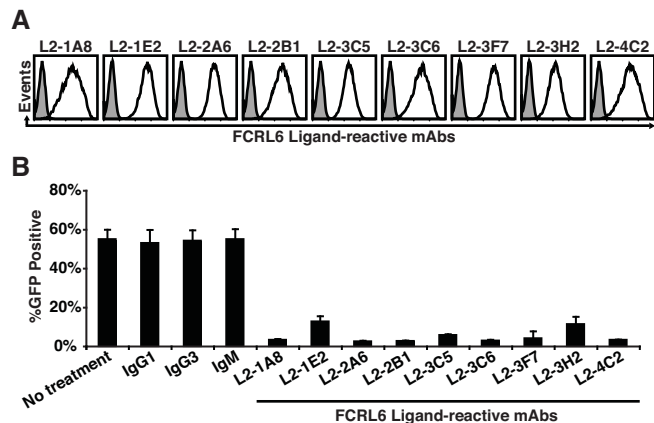

**Supplemental Figure 2.** Generation of a panel of FCRL6 ligand-reactive monoclonal antibodies. *A* SUDHL6 cells stained with the indicated monoclonal hybridoma supernatants (black line) or isotype-matched control mAbs (grey shade), were counterstained with a PE-labeled goat anti-mouse Ig secondary reagent and analyzed by flow cytometry. *B* FCRL6ζ cells were co-cultured with SUDHL6 cells either alone (“no treatment”) or in the presence of the indicated hybridoma supernatants and assayed for GFP expression. Control antibodies were used at a final concentration of 25μg/mL and were diluted in the same culture media used for growing hybridomas. Columns represent the mean ± s.d.; n=3.

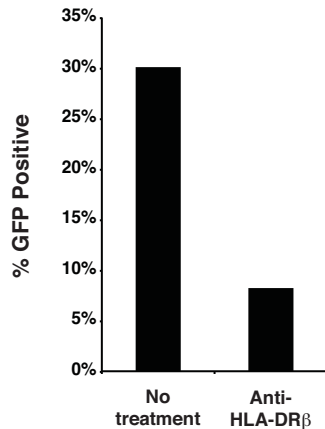

**Supplemental Figure 3.** An HLA-DR specific mAb blocks the FCRL6/HLA-DR interaction. FCRL6ζ cells were co-cultured for 18 h with SUDHL6 B cells either alone (“no treatment”) or in the presence of an HLA-DRβ-specific mAb (clone DA2) and assayed for GFP expression.

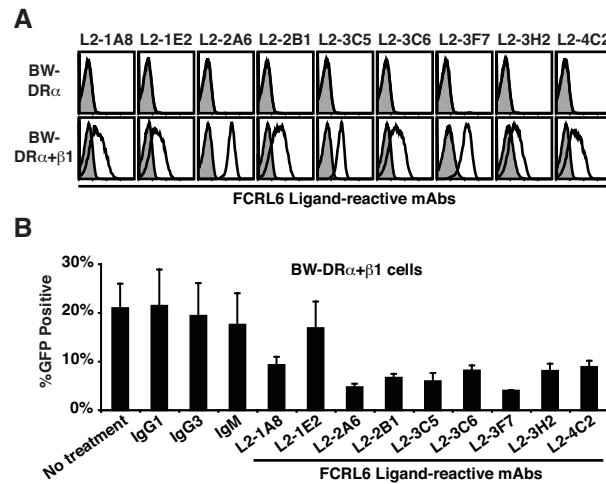

**Supplemental Figure 4.** FCRL6 ligand-reactive mAbs recognize HLA-DR. *A* Control BW5147 cells singly transduced with the HLA-DR $\alpha$  chain (top row) or co-transduced with the HLA-DR $\alpha$  and HLA-DR $\beta$ 1 chains (bottom row) were stained with FCRL6 ligand-reactive monoclonal hybridoma supernatants (black line) or isotype-matched control mAbs (grey shade), counterstained with goat anti-mouse Ig PE, and analyzed by flow cytometry. *B* FCRL6 $\zeta$  cells were co-cultured with BW5147 HLA-DR $\alpha$ + $\beta$ 1 transductants in the presence of the indicated hybridoma supernatants and assayed for GFP expression as in Figure 2B.

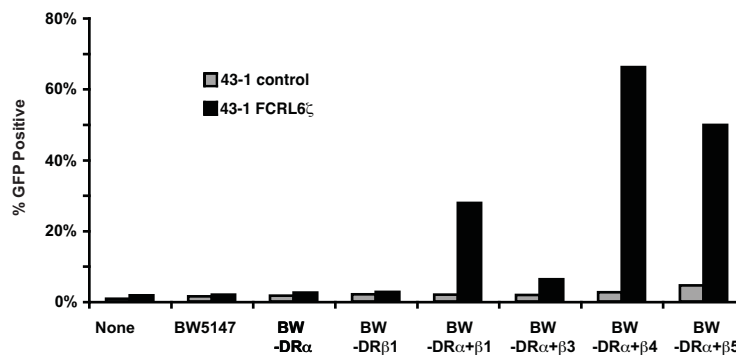

**Supplemental Figure 5.** FCRL6 binds HLA-DR molecules composed of distinct DR $\beta$  subunits. FCRL6 $\zeta$  (black columns) or untransduced 43-1 control cells (grey columns) were cultured for 18 h either alone (“none”) or in the presence of the indicated BW5147 transductants and analyzed for GFP expression.
